# Supplementary material for: Salicylic acid elicitation during cultivation of the peppermint plant improves anti-diabetic effects of its infusions
Source: Royal Society of Chemistry journal article supplement (doi:10.1039/c5fo00160a), 2015-01-01
Supplement: c5fo00160a1.pdf [file c5fo00160a1.pdf]

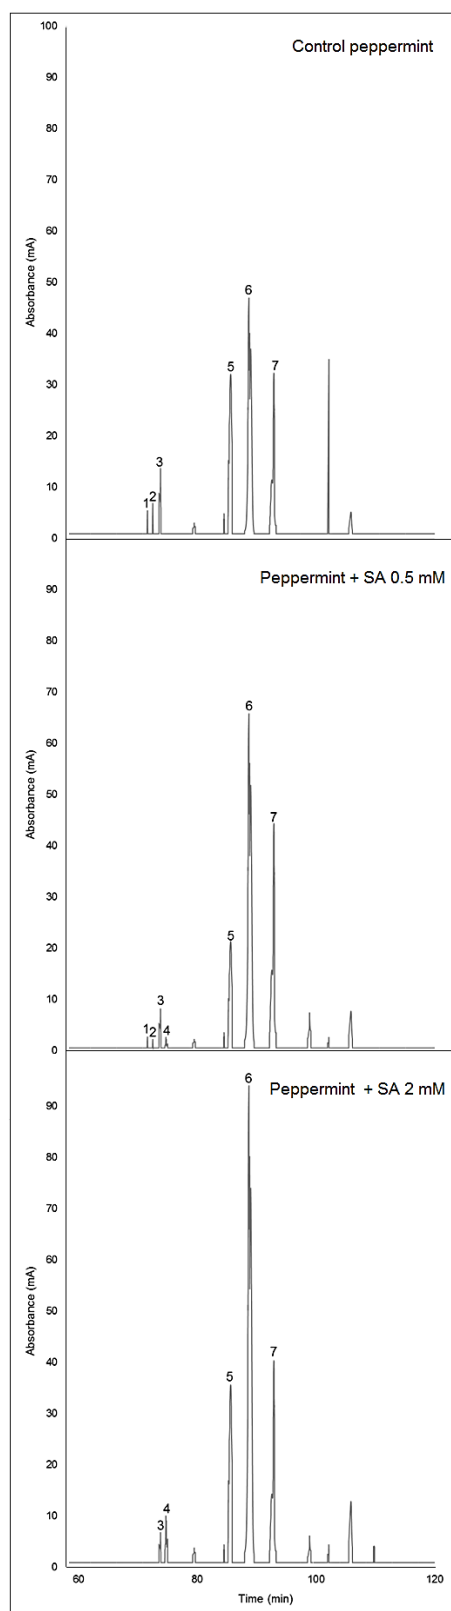

**Figure 1S.** Chromatographic profile of saponins acquired by HPLC-DAD-MSD (203 nm) of infusions prepared from peppermint (*Mentha piperita*) treated with salicylic acid. <sup>1</sup>Phytolaccagenic acid 3 $\beta$ -galactopyranosyde, <sup>2</sup>Phytolaccagenic acid 3 $\beta$ -arabinopyranosyde, <sup>3</sup>Hederagenin 3 $\beta$ -glucuronopyranosyde, <sup>4</sup>Serjanic acid 3 $\beta$ -arabinopyranosyde, <sup>5</sup>Campesteryl 3 $\beta$ -D-glucopyranoside, <sup>6</sup>Stigmasteryl 3 $\beta$ -D-glucopyranoside, <sup>7</sup>Sitosteryl 3 $\beta$ -D-glucopyranoside

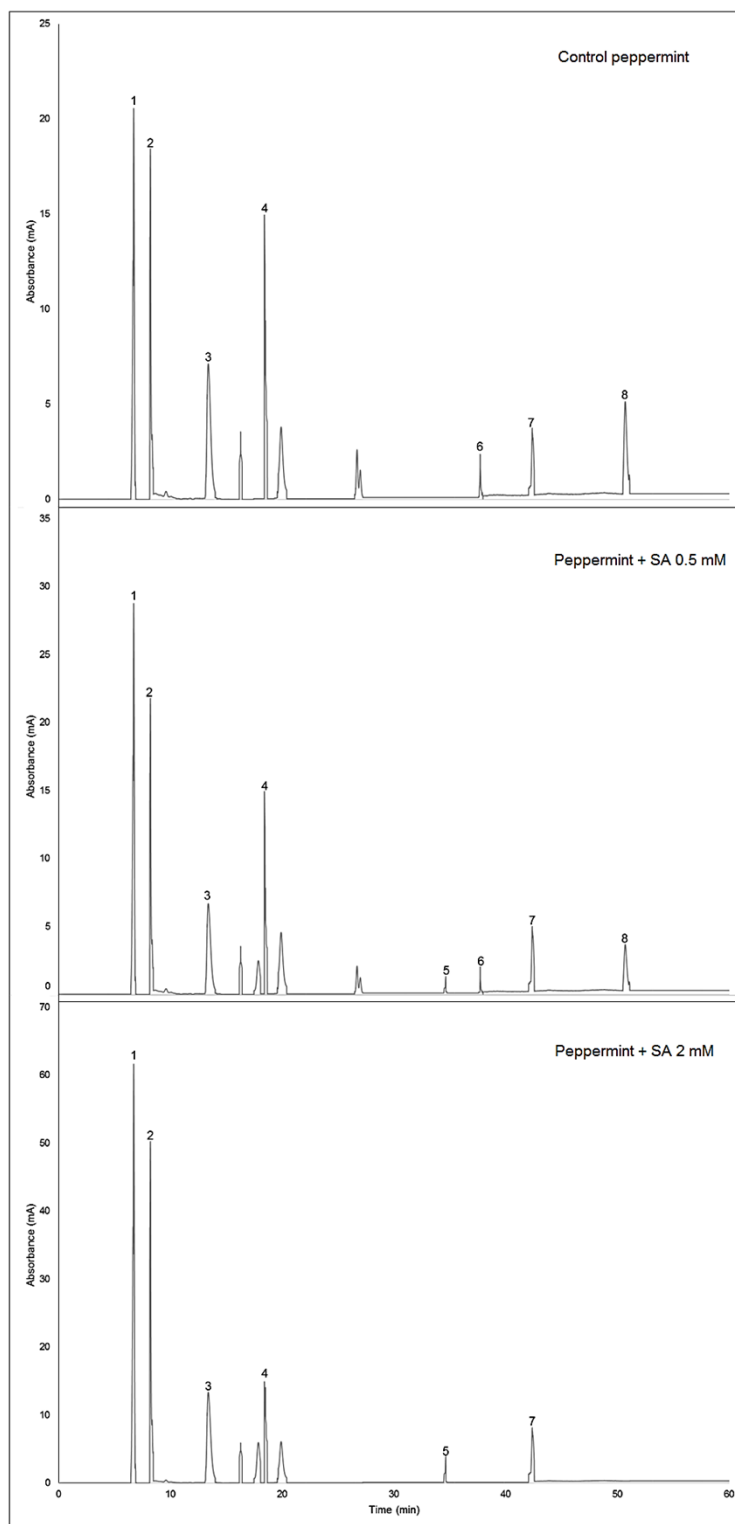

**Figure 2S.** Chromatographic profile of alkaloids acquired by HPLC-DAD-MSD (275 nm) of infusions prepared from peppermint (*Mentha piperita*) treated with salicylic acid. <sup>1</sup>Choline, <sup>2</sup>Trigonelline, <sup>3</sup>Nicotinic acid, <sup>4</sup>Sitsirikine, <sup>5</sup>Vinblastine, <sup>6</sup>Vindoline, <sup>7</sup>Catharanthine, <sup>8</sup>Vinleurosine.
